1        **Association between COVID-19, mobility and environment in São Paulo, Brazil**

2

3        **Authors and affiliation**

4

5        Sergio Ibarra-Espinosa

6        Departamento de Ciências Atmosféricas, Instituto de Astronomia, Geofísica e Ciências Atmosféricas, Universidade  
7        de São Paulo, Brazil

8

9        Edmilson Dias de Freitas

10       Departamento de Ciências Atmosféricas, Instituto de Astronomia, Geofísica e Ciências Atmosféricas, Universidade  
11       de São Paulo, Brazil

12

13       Karl Ropkins

14       Institute for Transport Studies, University of Leeds, UK

15

16       Francesca Dominici

17       Harvard Data Science Initiative, Harvard University, Boston, MA 02138, USA

18

19       Amanda Rehbein

20       Departamento de Ciências Atmosféricas, Instituto de Astronomia, Geofísica e Ciências Atmosféricas, Universidade  
21       de São Paulo, Brazil

22

23       **Corresponding author**

24       Sergio Ibarra-Espinosa

25       Departamento de Ciências Atmosféricas, Instituto de Astronomia, Geofísica e Ciências Atmosféricas, Universidade  
26       de São Paulo, Brazil

27       Phone +55 (11) 934 909 778

28       E-mail: [sergio.ibarra@usp.br](mailto:sergio.ibarra@usp.br)

29

30 **Association between COVID-19, mobility and environment in São Paulo, Brazil**

31 Sergio Ibarra-Espinosa<sup>1</sup>, Edmilson Dias de Freitas<sup>1</sup>, Karl Ropkins<sup>2</sup>, Francesca Dominici<sup>3</sup>, Amanda Rehbein<sup>1</sup>

32 <sup>1</sup> Departamento de Ciências Atmosféricas, Instituto de Astronomia, Geofísica e Ciências Atmosféricas,  
33 Universidade de São Paulo, Brazil

34 <sup>2</sup> Institute for Transport Studies, University of Leeds, UK

35 <sup>3</sup> Harvard Data Science Initiative, Harvard University, Boston, MA 02138, USA

36

37 Author correspondence: [sergio.ibarra@usp.br](mailto:sergio.ibarra@usp.br)

38

39 **Abstract**

40 **Background**

41 Brazil, the country most impacted by the coronavirus disease 2019 (COVID-19) on the southern hemisphere, uses  
42 mobility indices to monitor quarantines. In this study we quantified the associations between residential mobility  
43 index (RMI), air pollution, meteorology, and daily cases and deaths of COVID-19 in São Paulo, Brazil

44 **Objectives**

45 To acquire time-series data to estimate the associations between daily residential mobility index (RMI), air  
46 pollution, and meteorology, and daily cases and deaths for COVID-19 in São Paulo, Brazil.

47 **Methods**

48 We applied a semiparametric generalized additive model (GAM) to estimate: 1) the association between residential  
49 mobility index and cases and deaths due to COVID-19, accounting for ambient particulate matter (PM<sub>2.5</sub>), ozone  
50 (O<sub>3</sub>), relative humidity, temperature and delayed exposure between 3-21 days and 2) the association between  
51 exposure to for ambient particulate matter (PM<sub>2.5</sub>), ozone (O<sub>3</sub>), accounting for relative humidity, temperature and  
52 mobility.

53 **Results**

54 We found an RMI of 45.28% results in 1,212 cases (95% CI: 1,189 to 1,235) and 44 deaths (95% CI: 40 to 47).  
55 Reducing mobility 5% would avoid 438 cases and 21 deaths. Also, we found that an increment of 10 µg·m<sup>-3</sup> of PM<sub>2.5</sub>  
56 risk of 1.140 (95% CI: 1.021 to 1.274) for cases and of 1.086 (95% CI: 1.008 to 1.170) for deaths, while O<sub>3</sub> produces

57 a relative risk of 1.075 (95% CI: 1.006 to 1.150) for cases and 1.063 (95% CI: 1.006 to 1.124) for deaths,  
58 respectively.

59

## 60 **Discussion**

61 We compared our results with observations and literature review, finding well agreement. These results implicate  
62 that authorities and policymakers can use such mobility indices as tools to support social distance activities and  
63 assess their effectiveness in the coming weeks and months. Small increments of air pollution pose a risk of COVID-  
64 19 cases.

## 65 **Conclusion**

66 Spatial distancing is a determinant factor to control cases and deaths for COVID-19. Small increments of air  
67 pollution result in a high number of COVID-19 cases and deaths. PM<sub>2.5</sub> has higher relative risks for COVID-19 than  
68 O<sub>3</sub>.

69

70 **Keywords:** COVID-19, SARS-CoV 2, residential mobility index, air pollution, meteorology

71 **Introduction**

72 The world has been facing an unprecedented critical health crisis due to COVID-19 pandemic caused by the zoonotic  
73 severe acute respiratory syndrome coronavirus 2 (SARS-CoV2). According to the Johns Hopkins University (JHU)  
74 Center for Systems Science and Engineering (CSSE), on January 04, 2021, there were 85,510,573 confirmed cases  
75 of COVID-19 worldwide, and 1,849,054 deaths (Dong et al. 2020). Many countries implemented social isolation  
76 and quarantine strategies, and internet companies released aggregated location data to provide information on the  
77 effectiveness of quarantine and isolation (Google 2021). This new disease demonstrated that developed countries  
78 such as Belgium, Italy, and Spain were unprepared, which resulted in infection fatality rates (deaths/cases) of 15.4%,  
79 13.5%, and 10.2%, respectively. Furthermore, new mutations of SARS-CoV2 would present higher transmissibility  
80 and current vaccines might not offer protection against it (Gupta et al. 2021; Kupferschmidt 2021). Therefore, it is  
81 urgent and crucial to conduct more research to better understand the relationships and associations between SARS-  
82 CoV2 transmissibility and environmental factors.

83 COVID-19 spread very quickly across Latin America (Bolaño-Ortiz et al. 2020). As of January 4, 2021, Brazil is the  
84 third country with more cases (7,733,746) and deaths (196,018) (Dong et al. 2020). Brazil is a continental country  
85 with an area of 8.5 million km<sup>2</sup> and a population of 208 million. The city of São Paulo is the highest populated city  
86 in Brazil, with 11.8 million people (IBGE 2014), and also, with the highest number of COVID-19 cases (404,025)  
87 and deaths (15,725 (<https://covid.saude.gov.br/>)). In Brazil, only symptomatic cases are tested, hence, the real  
88 number of SARS-CoV2 infections could be much higher. A recent study shows that COVID-19 death notification in  
89 Brazil is underreported (Alves et al. 2020). On March 24, 2020 (GESp 2020), São Paulo's government  
90 recommended social distancing for suspected cases and introduced a local quarantine to reduce virus transmission.  
91 Brazil adopted containment measures such as close contact and limited mobility as protective measures, however  
92 "quarantine" was the official term used by São Paulo state government. During the São Paulo quarantine, the  
93 concentrations of carbon monoxide (CO), nitrogen dioxide (NO<sub>2</sub>), PM<sub>10</sub>, and PM<sub>2.5</sub> were reduced by -35.70%, -  
94 29.56%, -17.80%, and -25.02%, respectively. However, O<sub>3</sub> increased by 53.25% between 21:00-03:00 Local Time  
95 (LT) (Dantas et al. 2020; Freitas et al. 2020; Nakada and Urban 2020). Other studies showed reductions in China  
96 (30% of NO<sub>2</sub> and 25% of CO<sub>2</sub>) (Dutheil et al. 2020). However, there are indications that COVID-19 and air  
97 pollution interactions may be more complex. Some early reports suggest that longer-term exposure to air pollution  
98 increases susceptibility and severity upon infection (Tosepu et al. 2020; Wu et al. 2020). Similarly, meteorological

99 conditions are likely to be important but not easily predicted. For example, some studies have suggested that high  
100 humidity and temperature would reduce virus transmission (Wang et al. 2020a, 2020b). Furthermore, the biological  
101 inactivation rate of SARS-CoV2 is sensitive to humidity, with minimum half-life at 65% and higher at 40% and  
102 85%, and its decays at 27 °C is 10 times faster than at 10 °C (Morris et al. 2020). However, estimations for the  
103 Amazonian city of Manaus, which have a climatology<sup>1</sup> temperature 27 °C of and relative humidity 80.2% for July,  
104 show that between 44% and 66% of the population was infected with SARS-CoV-2 by July (Buss et al. 2020).  
105 Few studies have evaluated the effect of mobility on COVID-19, mainly in China. Kraemer et al., (2020) found  
106 correlation of 0.94 between real-time mobility data and COVID-19 cases from Wuhan, China, confirming the  
107 exportation of cases from Wuhan to other provinces and the effectiveness of the sanitaire cordon. Tian et al (2020)  
108 found that Wuhan shutdown delayed the appearance of COVID-19 in 2.9 days. In the US, Badr et al (2020)  
109 associated county-level origin-destination matrices and COVID-19 cases finding that counties with more mobility  
110 presented higher number of cases. In a related correspondence, Gatalo et al (2020) found that the absence of a strong  
111 correlation between growth of cases and mobility may be related to other factors, such as wearing mask, keeping  
112 distance in encounters and also, the existence of superspreading events.

113 Our study investigates the associations between RMI and COVID-19, and air pollution and COVID-19 on a  
114 particular day, having accounted for environmental and meteorological factors. We analyzed the effects of mobility,  
115 air pollution, and meteorology on the daily COVID-19 cases and deaths in the city of São Paulo. We applied  
116 semiparametric generalized additive models to study the effect of each predictor by isolating confounding factors  
117 (Peng and Dominici 2008). To the best of our knowledge, few studies have associated mobility air pollution,  
118 meteorological factors, and COVID-19 simultaneously especially in Latin America.

## 119 **Material and Methods**

120 The Brazilian Ministry of Health reports the official daily time-series of cases and mortality associated with  
121 COVID-19 at <https://covid.saude.gov.br/> updated once a day around 19:00 Brazilian official time (-3 GMT). This  
122 information is gathered from the 26 states and the federal district health secretaries and provided at the national,  
123 state, and municipality levels. The availability of data using the web site was interrupted on June 07, 2020, and

---

<sup>1</sup> Climatology between 1981-2010 <https://portal.inmet.gov.br/>

124 returned on June 08, 2020 after judicial demand<sup>1</sup>. When returned, it included the data obtained when the web site  
125 was offline. To check the trustworthiness of that data, we compared it with the dataset from BrasilIO  
126 (<https://brasil.io/covid19/>). The BrasilIO is an independent organization made of voluntaries that also gathers  
127 COVID-19 data from state health secretaries. Both datasets are very similar, in effect, we applied the Wilcoxon test  
128 (R Core Team 2020) for cases and deaths getting p-values of 0.7798 and 0.922, meaning that there are no significant  
129 differences between the two datasets. Therefore, we used the official data from the Brazilian Ministry of Health. The  
130 day July 29 was reported cases and deaths including July 28, therefore, we distributed the number of cases and  
131 deaths equally in both days. Figure 1 shows the daily time series and boxplots of cases and deaths from COVID-19  
132 in São Paulo State between March 27, 2020 and January 03, 2021. The mean of daily cases is 1432 and for daily  
133 deaths is 55, with a maximum of 7063 on August 13, 2020 and 179 deaths on June 23, 2020. Furthermore, the  
134 variance of cases is 1511183 and deaths 1889.89, indicating that overdispersion in the data. In effect, the dispersion  
135 parameter for cases is 1035.86 and for deaths 33.84 (both  $p\text{-value} < 0.05$ ) (Kleiber and Zeileis 2008). Currently, São  
136 Paulo is experiencing a second wave of COVID19.

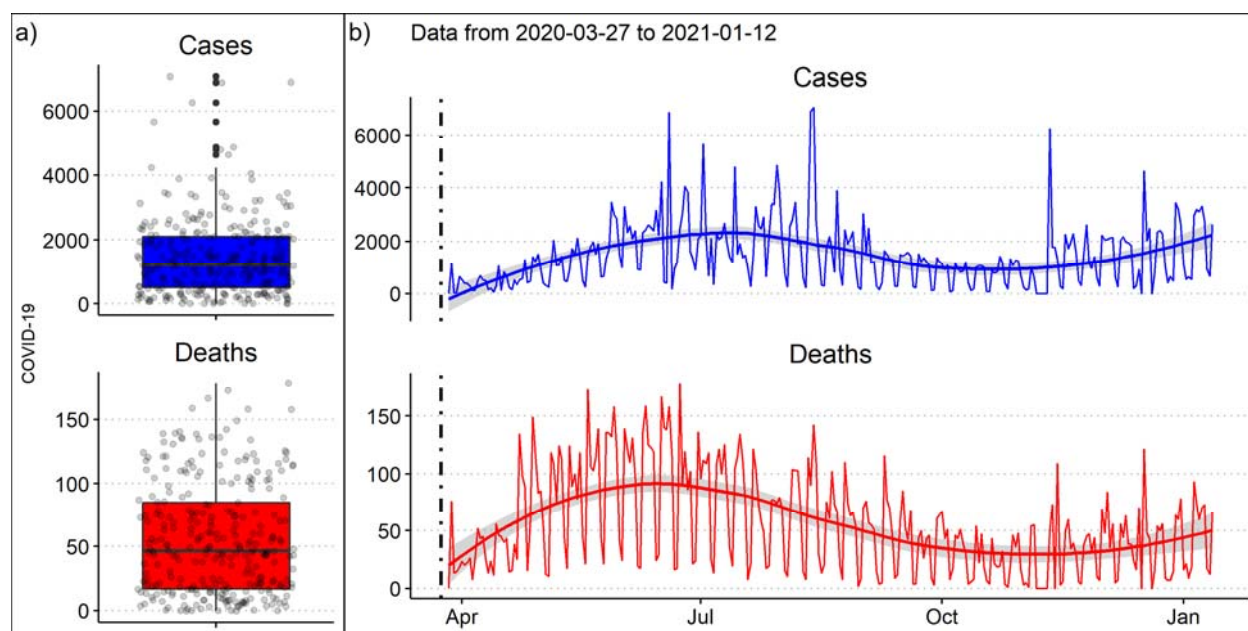

137  
138  
139  
140  
141  
Figure 1. Daily cases and deaths of COVID-19 in (a) boxplots and (b) time series in São Paulo, Brazil, between March 27, 2020 and January 12, 2021 (Saúde 2021). The smooth lines on panel b) are the LOESS regression made with ggplot2 and R (R Core Team 2020; Wickham 2016).

142 We obtained mobility indices datasets from Google mobility trends (Google, 2020) and the Intelligent Monitoring  
143 System for the city of São Paulo (SIMI-SP). The Google data is based on the use of smart devices such as  
144 cellphones, vehicle trackers, and other GPS enabled systems. The data reported by Google consists in mobility  
145 trends related to places as percentage change from baseline, with baseline as the median value, for each day of the  
146 week, during the 5-week period January 3 and February 6, 2020. We selected the mobility trend "residential",  
147 because it better represent the situation of spatial isolation (Hereafter Residential Mobility Index, RMI). The SIMI-  
148 SP data is collected by network companies which receive cellphone signals by triangulating with the nearest  
149 cellphone communication tower<sup>2</sup>. This means that SIMI-SP does not need internet to collect mobility information.  
150 Both indices are shown on Figure 2, meaning that higher values represent more stay-at-home and while lower  
151 values pre-quarantine conditions. RMI is an indicator that represent exposure in two ways, first, staying out of home  
152 increases the chances of getting infections with SARS-CoV2 present in aerosols (Morawska and Milton 2020) and  
153 second, increases the exposure to air pollution with deleterious effect on human health which could pose a  
154 synergetic effect. The trend on both RMI shows steady decline ahead of the start of quarantine on March 24, 2020  
155 (black vertical line) (GESP 2020). The median RMI for Google data 13.51% and for RMI SIMI-SP is 44.75% for  
156 the whole period. The median RMI for the pre-quarantine period, that is the first 15 days of March 2020, are -1% for  
157 Google and 31.30% for SIMI-SP and after the quarantine 14% for Google and 45.48% for SIMI-SP.

---

<sup>2</sup> <https://www.saopaulo.sp.gov.br/coronavirus/isolamento>

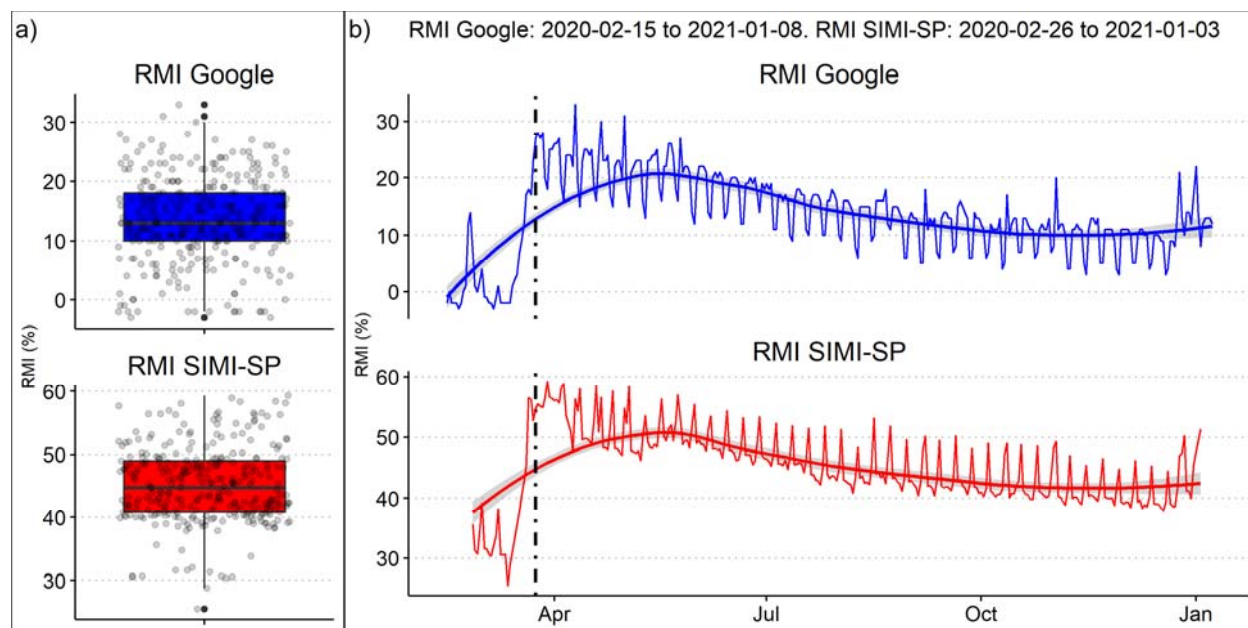

158  
159 Figure 2. RMI values in São Paulo, Brazil, in a) boxplots and b) times series between January 15 and December 29,  
160 2020 for RMI Google (Google 2021) and between February 26, 2020 and January 3, 2021. Black vertical line shows  
161 when started the quarantine in São Paulo on March, 24. The smooth lines on panel b) are the LOESS regression  
162 made with ggplot2 and R (R Core Team 2020; Wickham 2016).  
163

164 Air pollution and meteorology hourly surface measurements were obtained from the air quality system (QUALAR)  
165 operated by the Environmental Agency of Sao Paulo State (CETESB, 2020). QUALAR archives air quality real-  
166 time data using several stations spread in São Paulo. Hourly averages of  $O_3$  ( $\mu\text{g}/\text{m}^3$ ),  $\text{PM}_{2.5}$  ( $\mu\text{g}/\text{m}^3$ ), Relative  
167 Humidity (%) and Temperature ( $^{\circ}\text{C}$ ) are shown in Figure 3, between January 01<sup>st</sup>-, 2019 and January 4, 2021.  
168 Locally estimated scatterplot smoothing (or local regression LOESS) show that that the  $O_3$  incremented after the  
169 quarantine and remained higher than 2019 during most of 2020. The concentrations of  $\text{PM}_{2.5}$  during 2020 were  
170 lower than 2019, , related to the decrease in human activity and also, as reported by other studies (Bolaño-Ortiz et al.  
171 2020; Debone et al. 2020; Nakada and Urban 2020), and just in September concentration increased. The quarantine  
172 beginning coincided with the dry season beginning at São Paulo, presenting a decline in temperature compared to  
173 the early months of 2020. The most significant feature of the São Paulo dry season (though April to November), the  
174 wet season counterpart (Vera et al. 2006), is the non-significative precipitation amount, caused by weak isolated  
175 events, and long periods with no precipitation occurring in between (Rehbein et al. 2018), and the very low relative  
176 humidity during the daytime (climate reports from the Climate Group of Studies - GrEC/USP,  
177 <http://www.grec.iag.usp.br>). Also, a general decreasing in temperature occurs according to the austral winter and  
178 presenting drops in temperature, associated to the synoptic systems crossing São Paulo and generally are not able to  
8



179 organize convection (GrEC/USP, <http://www.grec.iag.usp.br>) or even sea breezes that eventually reaches the interior  
180 of São Paulo (Freitas et al. 2007). In 2020, for instance, from April 3-May 3, 2020 there was very few (2mm at São  
181 Paulo-SESC Interlagos station, in the south of São Paulo) or no precipitation (at the São Paulo-Mirante de Santana  
182 station, in the north of São Paulo) according to the official meteorological stations ([www.inmet.gov.br](http://www.inmet.gov.br)), while  
183 synoptic systems (such as cold fronts) were observed (CPTEC/INPE, <https://www.cptec.inpe.br>; GrEC/USP,  
184 <http://www.grec.iag.usp.br>). The first semester of 2020 was drier and colder than 2019, but during the second  
185 semester, relative humidity and temperature remained similar.

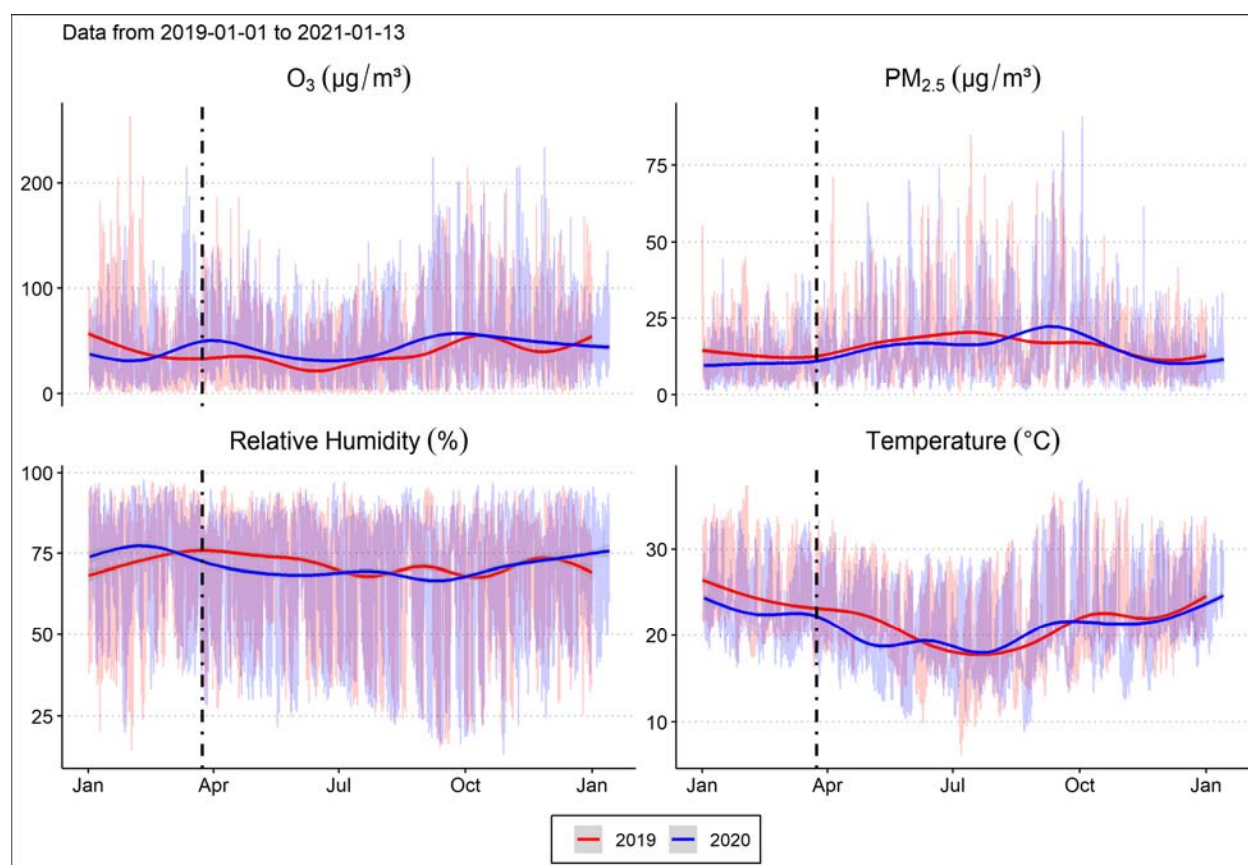

186

187 Figure 3. Hourly means of O<sub>3</sub> (µg/m<sup>3</sup>), PM<sub>2.5</sub> (µg/m<sup>3</sup>) and Air Temperature (°C) between January 1<sup>st</sup> 2020 and  
188 January 4 2021 for the city of São Paulo, Brazil (CETESB 2021). The means considered the parameters from the  
189 stations Congonhas, Cid.Universitária-USP-Ipen, Santana, Ibirapuera, Mooca, Pinheiros and Parque D. Pedro II.  
190 The red and blue lines are the automatic LOESS regression made with ggplot2 and R (R Core Team 2020; Wickham  
191 2016).  
192

### 193 *Association between mobility and COVID-19*

194 The statistical analyses consisted of the application of the generalized additive model (GAM) (Hastie and Tibshirani  
195 1990). One of the most common applications of this framework consists of a semi-parametric model in  
9

196 environmental studies to understand the associations between air pollution and health outcomes by controlling other  
197 factors such as meteorology (Dominici et al. 2004; Peng and Dominici 2008). Recently, a study has shown that air  
198 pollution can increase up to 15% of COVID-19 mortality and worldwide, 27% in East Asia, 19% in Europe and 17%  
199 in North America (Pozzer et al. 2020). It has been shown that health effects of air pollution is related to previous  
200 days' exposure (Abrutzky et al., 2013; Carracedo-Martínez et al., 2010; Leitte et al., 2009). In this study we need to  
201 consider the incubation period for COVID-19, that is the period of time between the exposure to SARS CoV2 and  
202 the symptom onset. Furthermore, in this study we want to characterize how the exposure, measured by the mobility  
203 indices, is associated with COVID-19. It has been reported that the incubation period for COVID-19 is 5.1 days  
204 (95% CI, 4.5 to 5.8 days (Kraemer et al. 2020; Lauer et al. 2020), Lai et al (2020) found between 2 and 14 days with  
205 a mean of 6.4 days another (Lai et al. 2020). Therefore, we calculated moving averages between 4 and 21 days of  
206 mobility and environmental factors, and study possible associations with COVID-19. We used thin plate splines for  
207 accounting confounding factors of  $PM_{2.5}$ ,  $O_3$ , temperature, relative humidity, day of the week and time, including  
208 interactions between the variables with quasi-poisson and negative binomial distributions to capture over-dispersion  
209 (Wood 2017; Zeileis et al. 2008). For instance, tropospheric  $O_3$  is a secondary pollutant generated by reactions  
210 between  $NO_x$ , Volatile Organic Compounds and solar radiation (Jacob 1999), and as the diurnal cycle of  
211 temperature follows solar cycle, we would expect statistical interactions between  $O_3$  and temperature. To identify  
212 associations between mobility and COID-19, by controlling confounding factors, we used the general equation 1.  
213 We performed a detailed sensitivity analyses between the variables, shown supplementary material S1.

$$(1) \quad \log(u_i) = \beta_0 + \beta_1 * RMI_{m,n} + s(PM_{2.5m}) + s(O_{3m}) + s(RH_m) + s(temp_m) + s(time) + s(dow)$$

214  
215 Where  $\log(u)$  is the log-transform of the daily cases and deaths of COVID-19 with a quasi-poisson or negative  
216 binomial distribution  $i$ ,  $\beta_0$  is the intercept  $\beta_1$  is the coefficient that represents the association of  $RMI_{m,n}$  moving  
217 average  $m$  using mobility data  $n$  from Google or SIMI-SP on cases,  $s$  the thin plate, and  $temp$  temperature,  $RH$   
218 relative humidity,  $PM_{2.5}$  and  $O_3$  atmospheric pollutants,  $time$  represents each day to account unobserved factors,  
219  $s(dow)$  is the cubic spline function with dimension of 7 to account for each day of the week. We used thin-plate  
220 splines to avoid knot placement and, therefore, avoid overfitting (Wood 2003). The predicted number of COVID-19  
221 cases is then  $exp(\beta_0 + \beta_1 * RMI_i)$ , which is conditionally to the other predictors. Although more pollutants are  
222 reported by São Paulo (QUALAR) air quality stations, e.g.,  $NO_2$ ,  $CO$ , and  $PM_{10}$ , we limited the model to  $PM_{2.5}$  and  
10

223 O<sub>3</sub> to avoid multicollinearity between PM<sub>2.5</sub> and these other species. As the objective of this study is to evaluate the  
224 effect of the quarantine measure, the data were filtered starting on March 24, 2020. In order to apply GAM, we used  
225 the R programming language and the library mgcv (v1.8.31)(R Core Team 2020; Wood 2017). One limitation of our  
226 method is the limited sample, consisting of 292 days between 2020-03-27 and 2020-12-30. Nevertheless, we  
227 performed a comprehensive sensitivity analyses, as we evaluated 18 equations with 4-21 moving average lag  
228 periods, and compared RMI data from Google and SIMI-SP with quasi-poisson and negative binomial distributions,  
229 this resulted in 1296 regressions. To ensure consistency, we repeated the analyses with data only until November  
230 2020 finding similar results.

### 231 *Association between air pollution and COVID-19*

232 We also study the effects of air pollution on COVID-19. In this case, we are interested in evaluating the effect of  
233 specific level of air pollution present on the same or previous specific days, rather than the moving average of air  
234 pollution. Many papers have used lag models to identify associations with air pollution and health outcomes  
235 (Gasparrini 2011; Peng and Dominici 2008). Therefore, we used lags to account for the delayed effect of air  
236 pollution on COVID-19 with a quasi-poisson and negative binomial distributions (Wood 2017; Zeileis et al. 2008).  
237 Thus, we used single-lag generalized additive models and different configuration for confounding variables with  
238 thin plate splines. To identify associations between air pollution and COVID-19, by controlling confounding factors,  
239 we used the general equation 2. A sensitivity analyses is available on supplementary material S2.

240

$$(2) \quad \log(u_i) = \beta_0 + \beta_1 * P_L + s(RMI_L) + s(temp_L) + s(time) + s(dow)$$

241

242 Where P represent the air pollutant concentrations of PM<sub>2.5L</sub> or O<sub>3L</sub>, temp<sub>L</sub>, RH<sub>L</sub>, and RMI<sub>L</sub> are the delayed  
243 environmental quantities at different lags l. The methodology is similar as we presented to calculate the effect of the  
244 RMI index, but in this case, we controlled all the variables except air pollution. This is useful to compare with other  
245 studies and to see the importance of exposure to air pollution and its effects on COVID-19 cases. Then, we  
246 calculated the relative risks of new cases by the increment of 10 µg·m<sup>-3</sup>air pollution with the expression  $\exp(\beta_1 * p_{\text{pollutant}})$ .  
247

## 248 **Results**

### 249 *Mobility and COVID-19 cases and deaths*

250 The associations between mobility indices RMI SIMI-SP and Google, parameter  $\beta_1$  on equations 1-21, are shown on  
251 Figure 4. The x-axis represents the model configurations from equations 1-20 and the facet labels 4-21 the delayed  
252 effect of exposure as moving average. RMI Google was not significantly associated with COVID-19 in any model.  
253 This can be explained by the low correlation between RMI Google with Cases -0.19 and with Deaths 0.1 (not  
254 significant), as shown on **Error! Reference source not found.** Au contraire, we did find statistical association  
255 between RMI SIMI-SP and COVID-19. It is evident increasing the mobility, that is staying out-of-home which  
256 results in lower RMI, have a delayed effect increasing COVID-19 cases after four to nine days of exposure. While  
257 some studies have shown that the incubation period for COVID-19 is between 4.5-5.8 days or 6.4 days (Kraemer et  
258 al. 2020; Lai et al. 2020; Lauer et al. 2020) here we found more days to confirm the case appearance in Brazil the  
259 Reverse transcription polymerase chain reaction (RT-PCR) tests to detect virus take between 3 days and one week.  
260 This explanation also applies to the expected cases after seven, eight, nine and 18 days of exposure. Regarding the  
261 deaths, we found more associations after 18-21 days of exposure, which makes sense because exposure between the  
262 exposure and the deaths there is the severe disease, which naturally implies more days. We also found increased  
263 deaths after 4 days of exposure, but the magnitude is also lower, nearer to zero. Furthermore, there is a trend after 14  
264 days of exposure decreasing the  $\beta_1$ , which means this association gains strength after more days, which after 21 days  
265 of exposure most of models signaled the association with mobility and COVID-19 death. These associations were  
266 found with negative binomial and quasi-poisson regressions, and the reader can reproduce these results following  
267 the instructions available in this public repository <https://gitlab.com/ibarraespinosa/covid191>.

268

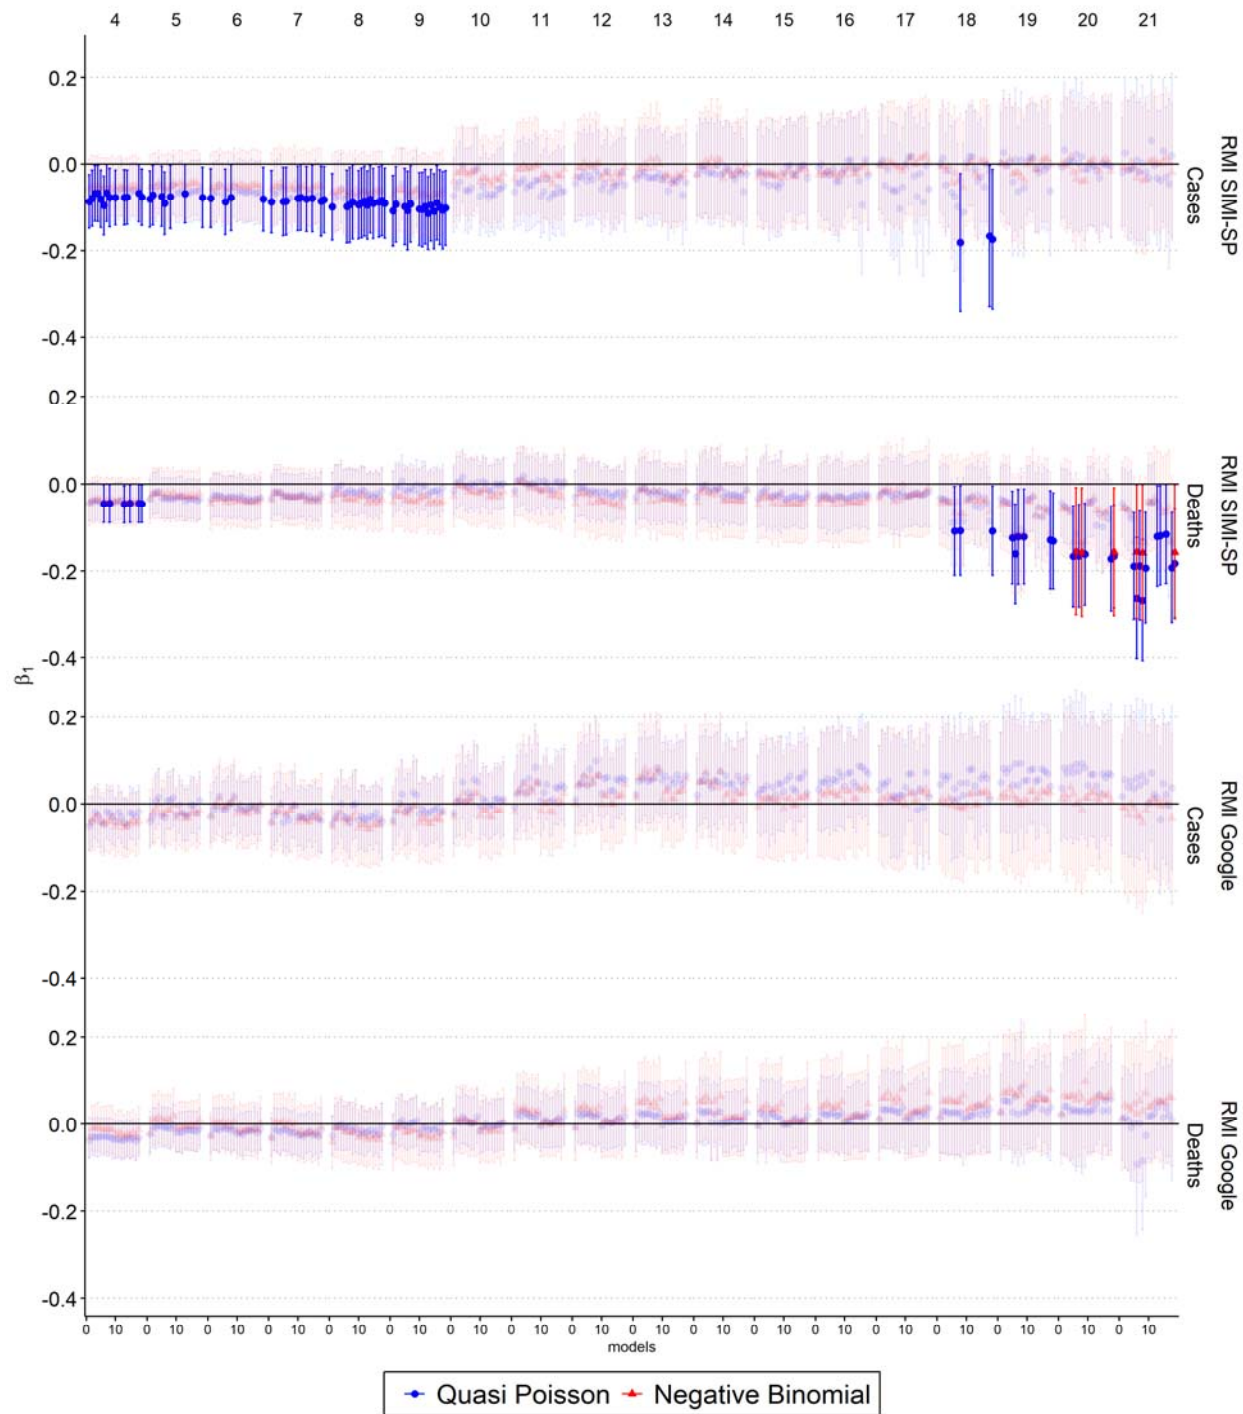

269  
270  
271  
272  
273  
274

Figure 4. Coefficient of association between RMI SIMI-SP (%) and Google (%) and COVID-19 cases and deaths with a moving average of four to 21 days of delayed exposure with quasi-poisson and negative binomial distribution under different model configuration. All non-significant associations ( $p$ -value  $> 0.05$ ) of  $\beta_1$  were plotted transparent (alpha = 0.2) so that we can clearly see the significant associations. (R Core Team 2020; Wickham 2016).

275

276 After analyzing the coefficients of association RMI and COVID-19, we calculated the expected outcomes after  
277 moving average periods. As the RMI produce significant results after several days of exposure, we grouped the  
278 results to obtain one curve exposure-response for cases and deaths, as shown on Figure 5. They grey points  
279 represents the expected cases and deaths under different exposure levels, expressed as RMI SIMI-SP and the red  
280 curves a gam regression with 95% confidence interval. We found strong associations between moving average of  
281 delayed exposure and COVID-19 cases and deaths. In other words, when people stayed home COVID-19 cases and  
282 deaths decreased. Likewise, with less RMI or increased outdoor activities, COVID-19 cases and resulting deaths  
283 increased. The mean RMI SIMI-SP during pre-quarantine (before March 15) was 31.10% and just after the  
284 quarantine (between March 27 and April 15) was 54.77%, reducing the mobility. Then, the association between RMI  
285 and cases was assessed with the median RMI SIMI-SP of 45.28% post-quarantine, presented as the second vertical  
286 black line in Figure 5. Under this RMI we would expect 1,212 cases (95% CI: 1,189 to 1,235) and 44 deaths (95%  
287 CI: 40 to 47). We applied the expected outcomes for several RMI values to evaluate the resulting cases for RMI  
288 extremes. For example, under the first quantile of RMI SIMI-SP, first vertical black line, that is 41.38%, it would  
289 result in 1,757 cases (95% CI: 1,734 to 1,780) and 80 deaths (95% CI: 77 to 84) and under the third quantile of  
290 48.87%, third vertical black line, it would result in 846 cases (95% CI: 823 to 869) and 25 deaths (95% CI: 22 to  
291 29). Analyzing the extreme values shows that, if the RMI SIMI-SP were 37.82% would result in 2,311 cases (95%  
292 CI: 2,285 to 2,338) and 127 deaths (95% CI: 122 to 131) and with RMI SIMI-SP of 59.25%, 351 cases (95% CI:  
293 325 to 378) and 8 deaths (95% CI: 4 to 13). Therefore, avoiding unnecessary outdoor activities and staying at home  
294 would result in a reduction in expected cases and deaths. We added a repeated histogram of RMI SIMI-SP on the top  
295 of Figure 5 so that it is easier to see the quantiles and histograms. This means that most of time RMI values are  
296 below 49%, resulting that mobility was increased contributing to the current second COVID-19 wave occurring in  
297 São Paulo.

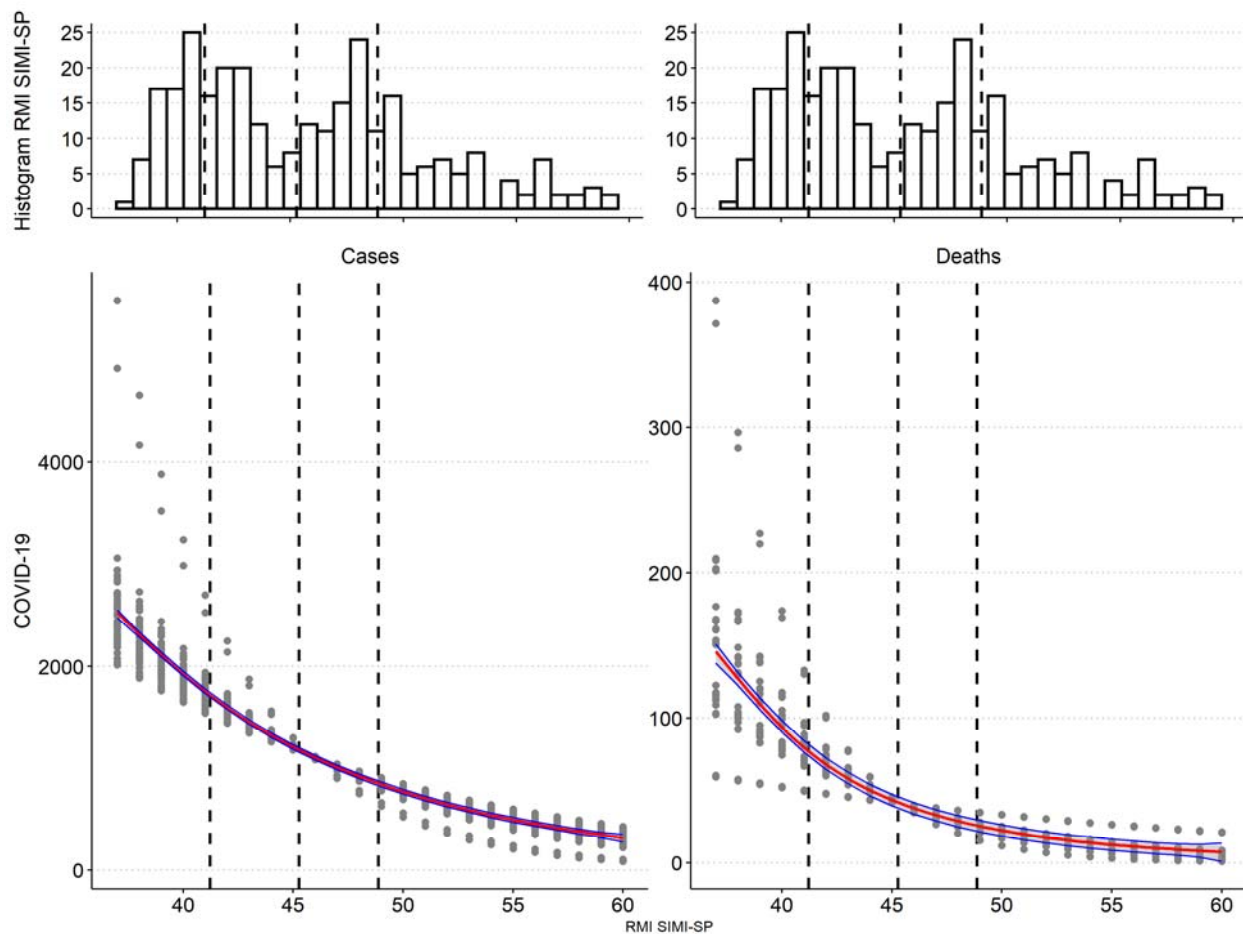

298

299 Figure 5. Association between COVID-19 cases and deaths and the percentage of RMI SIMI-SP (%). The grey  
 300 points show the association between COVID-19 and RMI after different periods of exposure. The red line  
 301 represents the expected cases and deaths and blue lines upper and lower confidence intervals 95%. The vertical  
 302 black lines show the first quantile, median and third quantile of RMI SIMI-SP. The histograms of RMI SIMI-SP are  
 303 repeated so that it is easier to the reader to compare cases with RMI.  
 304

305

306 *Air pollution and COVID-19 cases*

307 We assessed the association between COVID-19 and increment of  $10 \mu\text{g}\cdot\text{m}^{-3}$  of  $\text{PM}_{2.5}$  and  $\text{O}_3$ . Figure 6 shows the  
 308 relative risks of COVID-19 cases and deaths after 1-21 days of exposure. We found that  $\text{PM}_{2.5}$  and  $\text{O}_3$  have positive  
 309 relative risks for cases and deaths with both distributions. Furthermore,  $\text{O}_3$  increment cases after four and 13 days of  
 310 exposure, and deaths after two, four, 19 and 20 days of exposure. While,  $\text{PM}_{2.5}$  poses positive relative risks after  
 311 two, 10 and 13 days of exposure for cases and 17 days of exposure for deaths. Nevertheless, there are some relative  
 312 risks below 1, which would provide protective factors for  $\text{O}_3$  and  $\text{PM}_{2.5}$  after 17 days for cases where more research

313 is needed. The order of magnitude of relative risks within lagged group is very similar with different models, as  
314 shown on equations 21-28. Therefore, we averaged the relative risks within groups resulting that an increment of 10  
315  $\mu\text{g}\cdot\text{m}^{-3}$  of  $\text{O}_3$  produce cases-relative risks of 1.066 (95% CI: 1.005 to 1.131) and 1.084 (95% CI: 1.007 to 1.168) after  
316 four and 13 days of exposure, respectively. In the case of deaths, the  $\text{O}_3$ -related relative risks are 1.067 (95% CI:  
317 1.008 to 1.129), 1.050 (95% CI: 1.003 to 1.100), 1.070 (95% CI: 1.012 to 1.131) and 1.066 (95% CI: 1.001 to 1.135)  
318 after two, four, 19 and 20 days of exposure, respectively. Likewise, an increment of 10  $\mu\text{g}\cdot\text{m}^{-3}$  of  $\text{PM}_{2.5}$  produce  
319 cases-relative risks 1.151 (95% CI: 1.048 to 1.264), 1.113 (95% CI: 1.002 to 1.236) and 1.157(95% CI: 1.012 to  
320 1.323) after three, 10 and 14 days of exposure and the risk for death is 1.086 (95% CI: 1.008 to 1.170) after 17 days.  
321 Based on these results, air pollution significantly increases COVID-19 cases and deaths. The mean relative risks for  
322 cases are 1.140 for  $\text{PM}_{2.5}$  and 1.075 for  $\text{O}_3$ , meaning that  $\text{PM}_{2.5}$  increments 1.06 times more COVID-19 cases than  
323  $\text{O}_3$ . In the case of deaths, the relative risk for  $\text{O}_3$  is 1.063 and for  $\text{PM}_{2.5}$  1.086.



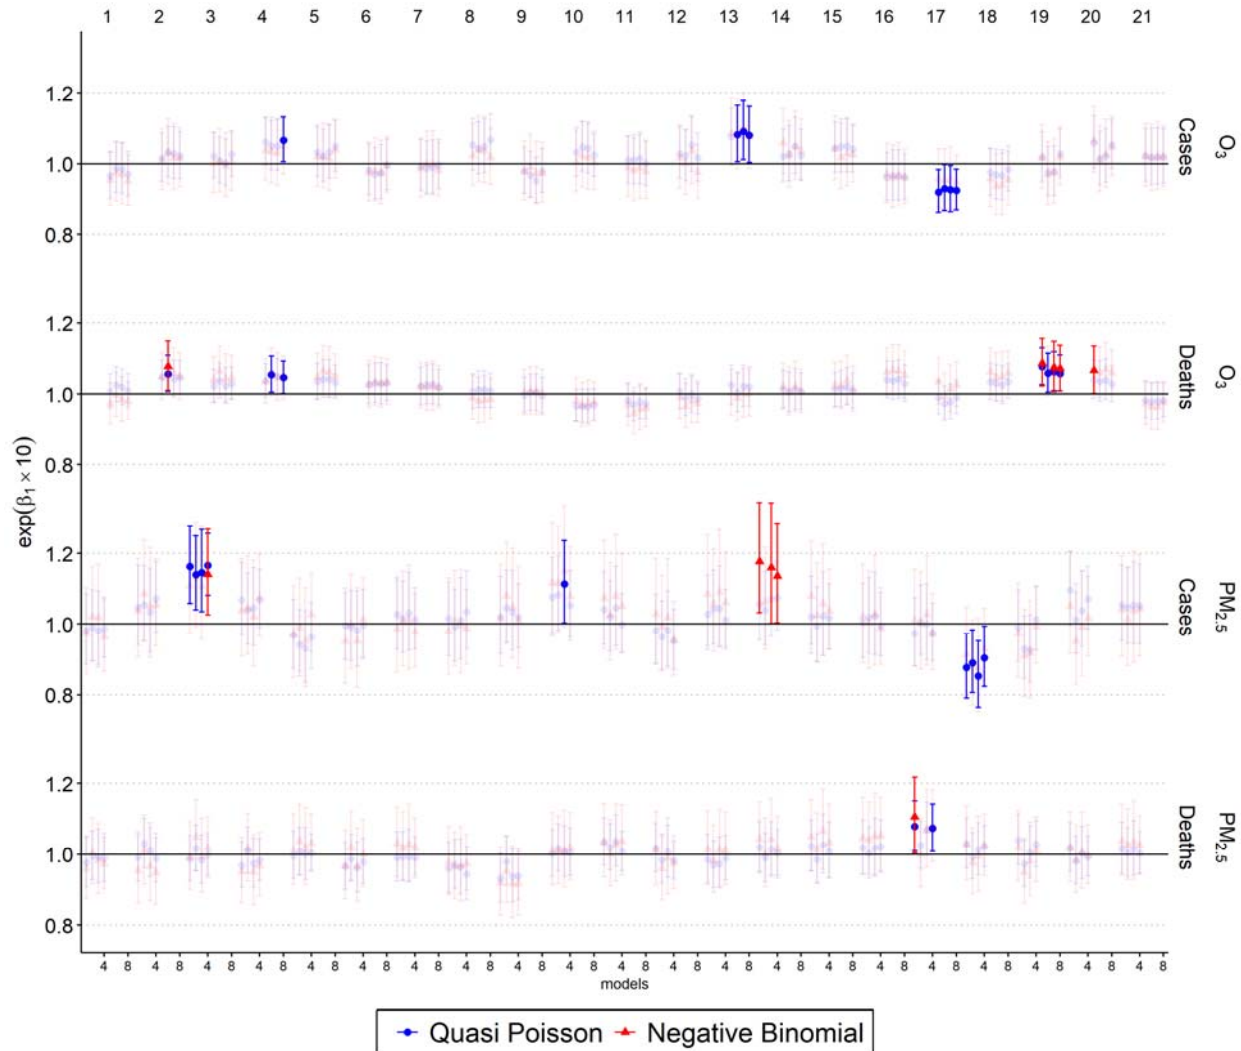

Figure 6. The relative risks of COVID-19 cases and deaths due to  $10 \mu\text{g}\cdot\text{m}^{-3}$  of  $\text{PM}_{2.5}$  and  $\text{O}_3$  after 1-21 days of exposure with single-lag models. All non-significant associations ( $p\text{-value} > 0.05$ ) of  $\beta_1$  were plotted transparent ( $\alpha = 0.2$ ) so that we can clearly see the significant associations.

### Discussion

In this study, we used a semiparametric Generalized Additive Model (GAM) to explore possible associations between RMI, air pollutants, and COVID-19 cases and deaths in São Paulo, Brazil, for March 27, 2020, through December 30, 2020. We controlled for environmental factors such as air temperature, relative humidity, and air pollutant concentrations of  $\text{PM}_{2.5}$  and  $\text{O}_3$  with thin splines.

We found statistical associations between RMI and COVID-19 cases and a lower RMI (i.e., the increase of residents staying-at-home) increase COVID-19 cases. Likewise, increased RMI or less outdoor activities decreases COVID-19 cases. The median RMI after quarantine started was 45.28%, which represents most of the period of study. Under

337 this RMI, we would expect 1,212 cases (95% CI: 1,189 to 1,235) and 44 deaths (95% CI: 40 to 47). São Paulo's  
338 COVID-19 median values are 1,214 and 46 for cases and deaths, which means that our predictions align with our  
339 observations. A Brazilian study covering several cities also found that increased mobility is associated with COVID-  
340 19 cases (Martins et al. 2020). We analyzed RMI values to provide policymakers with several options to mitigate the  
341 number of COVID-19 cases and deaths and support public health system. Then, if the mobility is reduced by  
342 increasing the RMI SIMI-SP index from 45.28% to 50.00%, we would expect 774 (95% CI: 751 to 797) cases and  
343 23 (95% CI: 19 to 26) deaths, representing a reduction 438 cases and 21 deaths by only increasing the RMI 5%.  
344 Therefore, a policymaker can use this information and define RMI targets based on the capacity of their health  
345 system.

346 We evaluated the effect of moving average air pollution on COVID-19 cases and deaths and we found strong  
347 associations. The average of the significant relative risk over the 21 days of delayed exposure is 1.140 (95% CI:  
348 1.021 to 1.274) for cases and 1.086 (95% CI: 1.008 to 1.170) for deaths due to an increment of 10  $\mu\text{g}\cdot\text{m}^{-3}$  of  $\text{PM}_{2.5}$ ,  
349 and 1.075 (95% CI: 1.006 to 1.150) for cases and 1.086 (95% CI: 1.008 to 1.170) for deaths due to an increment of  
350 10  $\mu\text{g}\cdot\text{m}^{-3}$  of  $\text{O}_3$ . A global study about the association between air pollution and death-risk for COVID-19 found that  
351 in South America the attributable fraction (AF) of COVID-19 mortality due  $\text{PM}_{2.5}$ , calculated as  $1-1/\text{RR}$ , is  
352 approximately 15% in São Paulo (Pozzer et al. 2020), while the AF due the increment of  $\text{PM}_{2.5}$  in Sao Paulo is  
353 12.28. Another study in China showed that 10  $\mu\text{g}\cdot\text{m}^{-3}$  of  $\text{O}_3$  results in relative risk of 1.047 (Zhu et al. 2020), which  
354 is slightly lower than our results of 1.075 presented in this study. Finally, Zhang et al (2021) found a country-  
355 average relative risk for  $\text{PM}_{2.5}$  of 1.06 (95% CI: 1.03 to 1.08), while relative risk found in Northeast and Southwest  
356 China oscillate around 1.2, similar to our result 1.140. Therefore, our results are in agreement with other studies.

357 As this study is based on 292 days of data, future research should consider the potential effects of a more extended  
358 period to study the effect of air pollution on COVID-19 related cases and deaths. Recent social distancing and  
359 quarantines have been introduced on unprecedented scales, made necessary by the high transmissivity and severity  
360 of COVID-19, and the lack of effective vaccines or testing programs (Cohen and Kupferschmidt 2020). This  
361 strongly suggests that mobility indices can be used to study infectious disease transmission and assess the  
362 effectiveness of large-scale isolation and quarantine style management activities. Therefore, policymakers can use  
363 the new mobility dataset to enforce efforts to implement more effective social distancing and quarantine-based  
364 management strategies for COVID-19.

365 Arguably, models like the one used here are more commonly applied to much larger datasets. However, we present  
366 findings and caveats, to provide early evidence on the transmission of COVID-19, and as part of efforts to highlight  
367 the potential value of the recently developed mobility indices.

### 368 **Conclusion**

369 Spatial distancing was proven to be a determining factor to control COVID-19 cases and deaths. RMI is also  
370 significantly associated with COVID-19 cases and deaths. Higher RMI values lower COVID-19 cases while lower  
371 values are related to a higher number of COVID-19 cases and deaths. Our predictions align with mean observations  
372 of COVID-19 cases. Air pollutant models revealed that an increment of  $10 \mu\text{g}\cdot\text{m}^{-3}$  of  $\text{PM}_{2.5}$  and  $\text{O}_3$  produces a  
373 relative risk of 1.140 (95% CI: 1.021 to 1.274) for cases and of 1.086 (95% CI: 1.008 to 1.170), and 1.075 (95% CI:  
374 1.006 to 1.150) for cases and 1.063 (95% CI: 1.006 to 1.124) for deaths, respectively.

### 375 **References**

376 Abrutzky R, Ibarra S, Matus P, Romero-Lankao P, Pereyra V, Dawidowski L. 2013. Atmospheric pollution and  
377 mortality. A comparative study between two Latin American cities: Buenos Aires (Argentina) and Santiago  
378 (Chile). *Int J Environ Heal* 6; doi:10.1504/IJENVH.2013.056977.

379 Alves THE, de Souza TA, de Almeida Silva S, Ramos NA, de Oliveira SV. 2020. Underreporting of death by COVID-19  
380 in Brazil's second most populous state. medRxiv.

381 Badr HS, Du H, Marshall M, Dong E, Squire MM, Gardner LM. 2020. Association between mobility patterns and  
382 COVID-19 transmission in the USA: a mathematical modelling study. *Lancet Infect Dis* 20: 1247–1254.

383 Bolaño-Ortiz TR, Camargo-Caicedo Y, Puliafito SE, Ruggeri MF, Bolaño-Diaz S, Pascual-Flores R, et al. 2020. Spread  
384 of SARS-CoV-2 through Latin America and the Caribbean region: a look from its economic conditions, climate  
385 and air pollution indicators. *Environ Res* 109938; doi:<https://doi.org/10.1016/j.envres.2020.109938>.

386 Buss LF, Prete CA, Abraham CMM, Mendrone A, Salomon T, de Almeida-Neto C, et al. 2020. Three-quarters attack  
387 rate of SARS-CoV-2 in the Brazilian Amazon during a largely unmitigated epidemic. *Science* (80- );  
388 doi:10.1126/science.abe9728.

389 Carracedo-Martínez E, Taracido M, Tobias A, Saez M, Figueiras A. 2010. Case-crossover analysis of air pollution

- 390 health effects: a systematic review of methodology and application. *Environ Health Perspect* 118: 1173–  
391 1182.
- 392 CETESB. 2021. Sistema de monitoramento de qualidade do ar QUALAR. Available:  
393 <https://qualar.cetesb.sp.gov.br/> [accessed 4 January 2021].
- 394 Cohen J, Kupferschmidt K. 2020. Countries test tactics in ‘war’ against COVID-19.
- 395 Dantas G, Siciliano B, França BB, da Silva CM, Arbilla G. 2020. The impact of COVID-19 partial lockdown on the air  
396 quality of the city of Rio de Janeiro, Brazil. *Sci Total Environ* 729:139085;  
397 doi:<https://doi.org/10.1016/j.scitotenv.2020.139085>.
- 398 Debone D, da Costa M V, Miraglia SGEK. 2020. 90 days of COVID-19 social distancing and its impacts on air quality  
399 and health in Sao Paulo, Brazil. *Sustainability* 12: 7440.
- 400 Dominici F, McDermott A, Hastie TJ. 2004. Improved semiparametric time series models of air pollution and  
401 mortality. *J Am Stat Assoc* 99: 938–948.
- 402 Dong E, Du H, Gardner L. 2020. An interactive web-based dashboard to track COVID-19 in real time. *Lancet Infect*  
403 *Dis* 20: 533–534.
- 404 Dutheil F, Baker JS, Navel V. 2020. COVID-19 as a factor influencing air pollution? *Environ Pollut (Barking, Essex*  
405 *1987)*.
- 406 Freitas ED, Rozoff CM, Cotton WR, Dias PLS. 2007. Interactions of an urban heat island and sea-breeze circulations  
407 during winter over the metropolitan area of São Paulo, Brazil. *Boundary-Layer Meteorol* 122: 43–65.
- 408 Freitas, Ibarra-Espinosa S, Gavidia-Calderón M, Rehbein A, Abou Rafeem Sameh Martins J, Martins L, et al. 2020.  
409 Mobility restrictions and air quality under COVID-19 pandemic in São Paulo, Brazil. Preprints;  
410 doi:[10.20944/preprints202004.0515.v1](https://doi.org/10.20944/preprints202004.0515.v1).
- 411 Gasparrini A. 2011. Distributed lag linear and non-linear models in {R}: the package {dlnm}. *J Stat Softw* 43: 1–20.
- 412 Gatalo O, Tseng K, Hamilton A, Lin G, Klein E. 2020. Associations between phone mobility data and COVID-19 cases.

- 413 Lancet Infect Dis.
- 414 GESP. 2020. Decreta quarentena no Estado de São Paulo, no contexto da pandemia do CO VID-19. Available:  
415 <http://dobuscadireta.imprensaoficial.com.br/default.aspx?DataPublicacao=20200323&Caderno=DOE->  
416 [I&NumeroPagina=1.](http://dobuscadireta.imprensaoficial.com.br/default.aspx?DataPublicacao=20200323&Caderno=DOE-I&NumeroPagina=1)
- 417 Google. 2021. Community Mobility Reports. Available: <https://www.google.com/covid19/mobility/> [accessed 4  
418 January 2021].
- 419 Gupta R, Collier D, De Marco A, Ferreira I, Meng B, Datir R, et al. 2021. SARS-CoV-2 B. 1.1. 7 escape from mRNA  
420 vaccine-elicited neutralizing antibodies. Prepr (Version 1) available Res Sq [[https://doi.org/10.21203/rs-  
421 156101/v1](https://doi.org/10.21203/rs.3.rs-156101/v1)].
- 422 Hastie TJ, Tibshirani RJ. 1990. *Generalized additive models*. CRC press.
- 423 IBGE. 2014. Instituto Brasileiro de Geografia e Estatística -- Población estimada 2014.
- 424 Jacob DJ. 1999. *Introduction to atmospheric chemistry*. Princeton University Press.
- 425 Kleiber C, Zeileis A. 2008. *Applied econometrics with R*. Springer Science & Business Media.
- 426 Kraemer MUG, Yang C-H, Gutierrez B, Wu C-H, Klein B, Pigott DM, et al. 2020. The effect of human mobility and  
427 control measures on the COVID-19 epidemic in China. *Science* (80- ) 368: 493–497.
- 428 Kupferschmidt K. 2021. Fast-spreading U.K. virus variant raises alarms. *Science* (80- ) 371:9–10;  
429 doi:10.1126/science.371.6524.9.
- 430 Lai C-C, Shih T-P, Ko W-C, Tang H-J, Hsueh P-R. 2020. Severe acute respiratory syndrome coronavirus 2 (SARS-CoV-  
431 2) and corona virus disease-2019 (COVID-19): the epidemic and the challenges. *Int J Antimicrob Agents*  
432 105924.
- 433 Lauer SA, Grantz KH, Bi Q, Jones FK, Zheng Q, Meredith HR, et al. 2020. The incubation period of coronavirus  
434 disease 2019 (COVID-19) from publicly reported confirmed cases: estimation and application. *Ann Intern  
435 Med*.

- 436 Leitte AM, Petrescu C, Franck U, Richter M, Suciú O, Ionovici R, et al. 2009. Respiratory health, effects of ambient  
437 air pollution and its modification by air humidity in Drobeta-Turnu Severin, Romania. *Sci Total Environ* 407:  
438 4004–4011.
- 439 Martins LD, da Silva I, Batista WV, de Fátima Andrade M, de Freitas ED, Martins JA. 2020. How socio-economic and  
440 atmospheric variables impact COVID-19 and influenza outbreaks in tropical and subtropical regions of Brazil.  
441 *Environ Res* 191: 110184.
- 442 Morawska L, Milton DK. 2020. It Is Time to Address Airborne Transmission of Coronavirus Disease 2019 (COVID-  
443 19). *Clin Infect Dis*; doi:10.1093/cid/ciaa939.
- 444 Morris DH, Yinda KC, Gamble A, Rossine FW, Huang Q, Bushmaker T, et al. 2020. Mechanistic theory predicts the  
445 effects of temperature and humidity on inactivation of SARS-CoV-2 and other enveloped viruses. *bioRxiv*;  
446 doi:10.1101/2020.10.16.341883.
- 447 Nakada LYK, Urban RC. 2020. COVID-19 pandemic: Impacts on the air quality during the partial lockdown in São  
448 Paulo state, Brazil. *Sci Total Environ* 730:139087; doi:<https://doi.org/10.1016/j.scitotenv.2020.139087>.
- 449 Peng RD, Dominici F. 2008. Statistical methods for environmental epidemiology with R. R a case study air Pollut  
450 Heal.
- 451 Pozzer A, Dominici F, Haines A, Witt C, Münzel T, Lelieveld J. 2020. Regional and global contributions of air  
452 pollution to risk of death from COVID-19. *Cardiovasc Res*; doi:10.1093/cvr/cvaa288.
- 453 R Core Team. 2020. R: A Language and Environment for Statistical Computing.
- 454 Rehbein A, Dutra LMM, Ambrizzi T, da Rocha RP, Reboita MS, da Silva GAM, et al. 2018. Severe weather events  
455 over southeastern Brazil during the 2016 dry season. *Adv Meteorol* 2018.
- 456 Saúde M de. 2021. Coronavírus Brasil. Available: <https://covid.saude.gov.br/> [accessed 4 January 2021].
- 457 Tian H, Liu Y, Li Y, Wu C-H, Chen B, Kraemer MUG, et al. 2020. An investigation of transmission control measures  
458 during the first 50 days of the COVID-19 epidemic in China. *Science* (80- ) 368:638–642;  
459 doi:10.1126/science.abb6105.

- 460 Tosepu R, Gunawan J, Effendy DS, Lestari H, Bahar H, Asfian P, et al. 2020. Correlation between weather and Covid-  
461 19 pandemic in Jakarta, Indonesia. *Sci Total Environ* 138436.
- 462 Vera C, Higgins W, Amador J, Ambrizzi T, Garreaud R, Gochis D, et al. 2006. Toward a Unified View of the American  
463 Monsoon Systems. *J Clim* 19:4977–5000; doi:10.1175/JCLI3896.1.
- 464 Wang J, Tang K, Feng K, Lv W. 2020a. High temperature and high humidity reduce the transmission of COVID-19.  
465 Available SSRN 3551767.
- 466 Wang M, Jiang A, Gong L, Luo L, Guo W, Li C, et al. 2020b. Temperature significant change COVID-19 Transmission  
467 in 429 cities. medRxiv.
- 468 Wickham H. 2016. *ggplot2: Elegant Graphics for Data Analysis*. Springer-Verlag New York.
- 469 Wood S. 2017. *Generalized Additive Models: An Introduction with R*. Chapman and Hall/CRC.
- 470 Wood SN. 2003. Thin plate regression splines. *J R Stat Soc Ser B (Statistical Methodol* 65: 95–114.
- 471 Wu X, Nethery RC, Sabath BM, Braun D, Dominici F. 2020. Exposure to air pollution and COVID-19 mortality in the  
472 United States. medRxiv.
- 473 Zeileis A, Kleiber C, Jackman S. 2008. Regression Models for Count Data in R. *J Stat Software*, Artic 27:1–25;  
474 doi:10.18637/jss.v027.i08.
- 475 Zhang X, Tang M, Guo F, Wei F, Yu Z, Gao K, et al. 2021. Associations between air pollution and COVID-19 epidemic  
476 during quarantine period in China. *Environ Pollut* 268:115897;  
477 doi:<https://doi.org/10.1016/j.envpol.2020.115897>.
- 478 Zhu Y, Xie J, Huang F, Cao L. 2020. Association between short-term exposure to air pollution and COVID-19  
479 infection: Evidence from China. *Sci Total Environ* 727:138704;  
480 doi:<https://doi.org/10.1016/j.scitotenv.2020.138704>.

481

482       **Acknowledgments:** The authors would like to thank the São Paulo's Environmental Agency (CETESB), for making  
483 possible the use of air quality measurements through its QUALAR platform. The authors would like to thank Lena  
484 Goodwin for the support. **Funding:** This work was supported by FAPESP (Grants No. 2015/03804-9, 2016/18438-0  
485 and 2016/10557-0) and "Coordenação de Aperfeiçoamento de Pessoal de Nível Superior – Brasil" (CAPES) Finance  
486 Code 001; **Author contributions:** Conceptualization, S.I.E. and E.F.; Methodology, S.I.E, E.F., F.D., K.R., A.R.;  
487 Investigation, S.I.E, E.F., K.R., F.D. and A.R.; Writing – Original Draft, S.I.E., K.R. and E.D.; Writing – Review &  
488 Editing, S.I.E., K.R., E.F., F.D. and A.R.; Funding Acquisition, E.F.; Supervision, E.F. and F.D; **Competing**  
489 **interests:** Authors declare no competing interests; and **Data and materials availability:** All the data and code used  
490 in this study is available at the only repository <https://gitlab.com/ibarraespinosa/covid191>.
